# Supplementary material for: Influence of Specimen Size and Shape on the Uniaxial Compressive Strength Values of Rocks
Source: Research Square preprint supplement (doi:10.21203/rs.3.rs-670782/v1), 2021-08-03
Supplement: Supplementary file 1 [file 3294473959bc01e6b906c679.xlsx]

## Sheet: Table 3
Lithological type	Uniaxial compressive strength				Difference
	MPa				%
	cube	cylinder	prism	cylinder	cube/cylinder	prism/cylinder
	50x50x50 mm	d = 50 mm h = 50 mm	50x50x100 mm	d = 50 mm h = 100 mm	h/d = 1	h/d = 2
Sandstone	178	141	169	136	+21	+20
Limestone	128	111	112	104	+13	+7
Granodiorite	124	146	108	115	-15	- 6
Andesite	213	201	-	-	+6	-
